# Supplementary material for: Core/Shell Ag/SnO2 Nanowires for Visible Light Photocatalysis
Source: MDPI journal article supplement (doi:10.3390/catal12010030), 2021-12-28
Supplement: s1 [file s1]

# Core/Shell Ag/SnO<sub>2</sub> Nanowires for Visible Light Photocatalysis

Anna Baranowska-Korczyc<sup>1,2,\*</sup>, Ewelina Mackiewicz<sup>1</sup>, Katarzyna Ranoszek-Soliwoda<sup>1</sup>, Jarosław Grobelny<sup>1</sup> and Grzegorz Celichowski<sup>1,\*</sup>

<sup>1</sup> Department of Materials Technology and Chemistry, Faculty of Chemistry, The University of Lodz, Pomorska 163, 90-236 Lodz, Poland; e.a.mackiewicz@gmail.com (E.M.); katarzyna.soliwoda@chemia.uni.lodz.pl (K.R.-S.); jaroslaw.grobelny@chemia.uni.lodz.pl (J.G.)

<sup>2</sup> Department of Chemical Textiles Technologies, ŁUKASIEWICZ-Textile Research Institute, 5/15 Brzezinska Street, 92-103 Lodz, Poland

\* Correspondence: anna.baranowska-korczyc@iw.lukasiewicz.gov.pl (A.B.-K.); grzegorz.celichowski@chemia.uni.lodz.pl (G.C.)

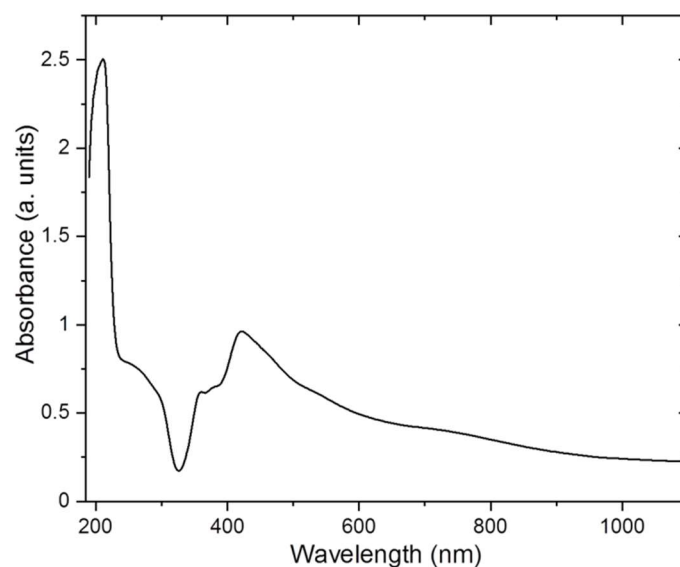

**Figure S1.** Absorbance spectra of core/shell Ag/SnO<sub>2</sub>NWs.

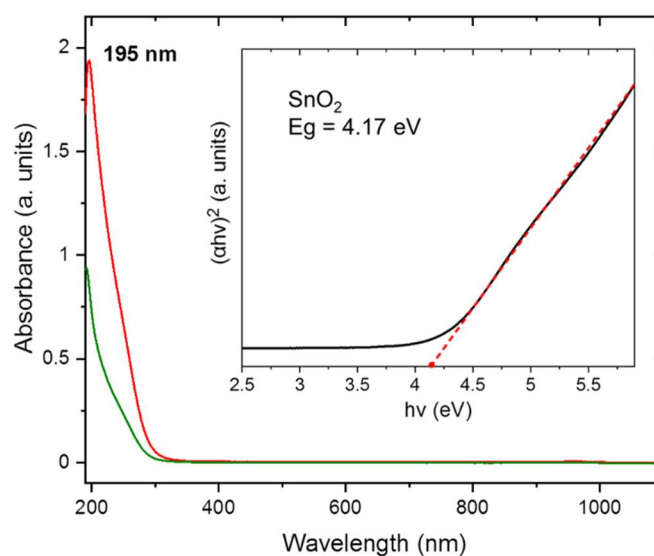

**Figure S2.** Absorbance spectra of SnO<sub>2</sub>NPs at the concentrations of 2 and 0.66 mg/ml and (inset) Tauc plot for SnO<sub>2</sub> energy gap value determination.

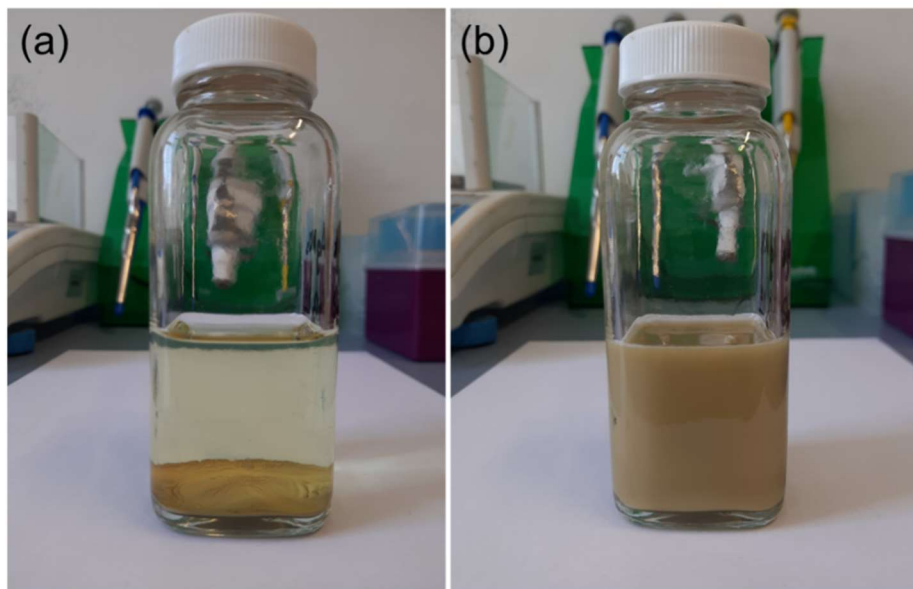

**Figure S3.** The images of an aqueous solution of Ag/SnO<sub>2</sub>NWS (a) left for 48h for sedimentation and (b) then gently mixed to redisperse the core/shell nanowires.

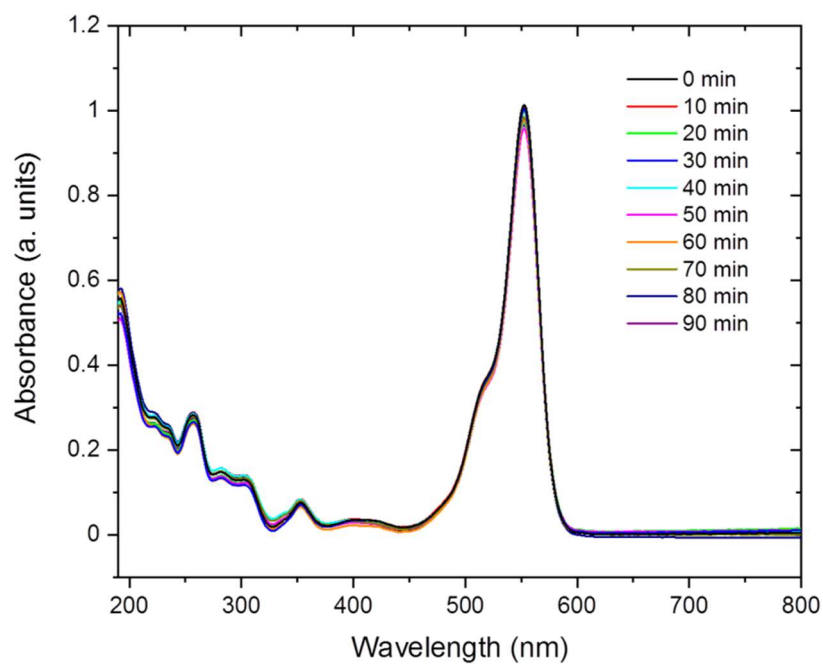

**Figure S4.** Absorbance spectra of rhodamine B without any irradiation after centrifugation of Ag/SnO<sub>2</sub>NWs photocatalyst (dark experiment).

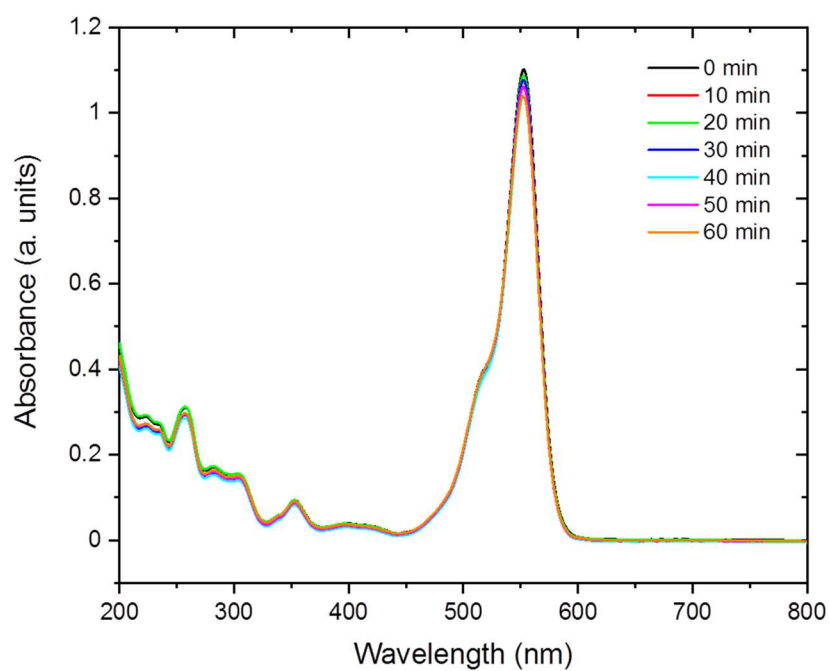

**Figure S5.** Absorbance spectra of rhodamine B irradiated under 359 nm without catalyst.

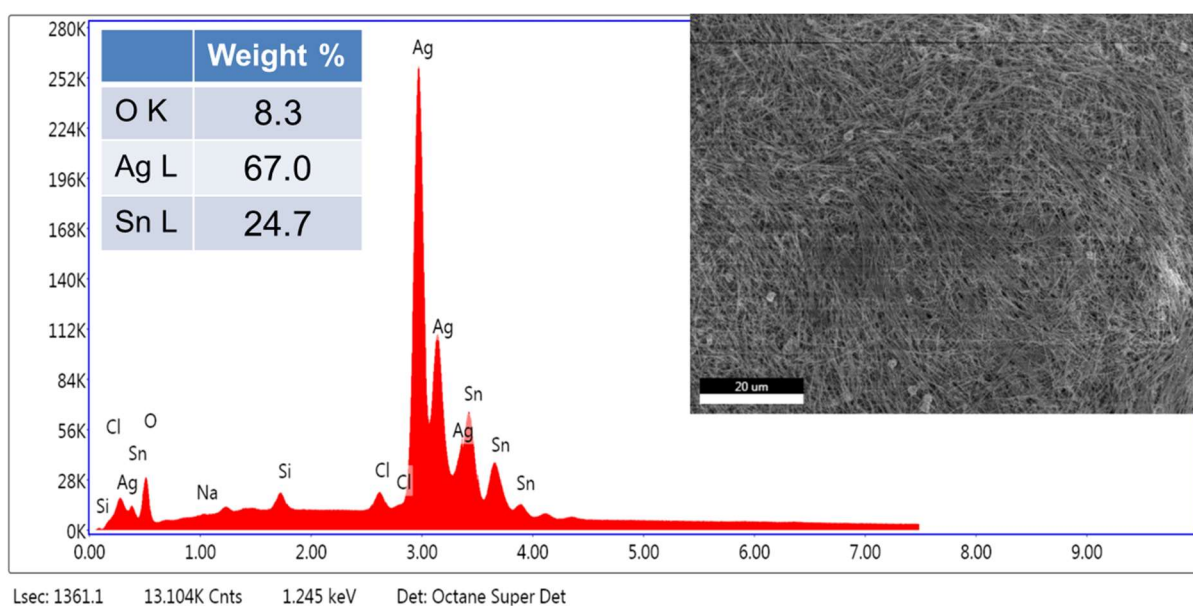

**Figure S6.** EDS spectrum of Ag/SnO<sub>2</sub>NWs, inset: weight percentage of O, Ag and Sn in the hybrid, and STEM image of the sample area for EDS analysis.

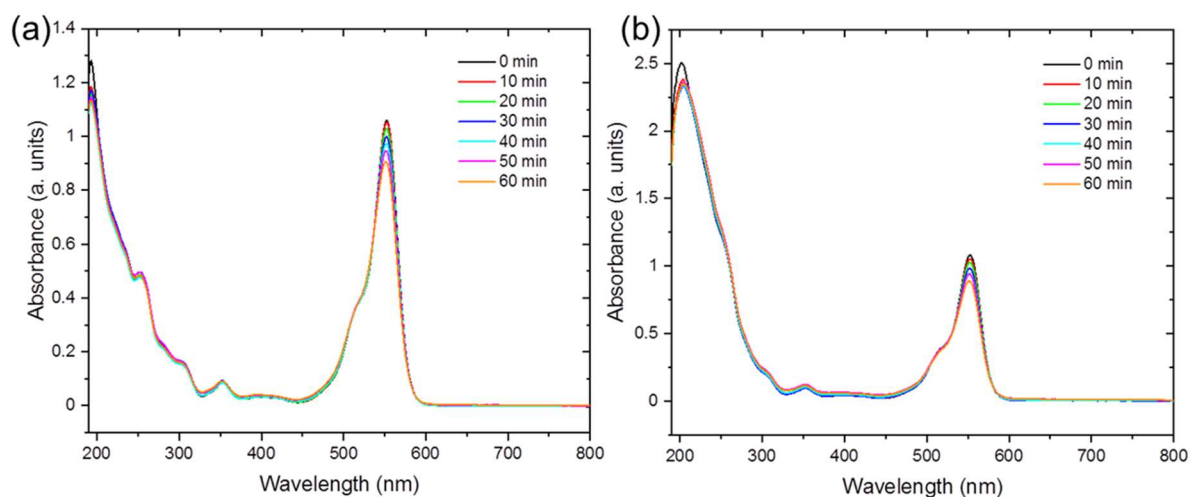

**Figure S7.** Absorbance spectra of rhodamine B and SnO<sub>2</sub>NPs at a concentration of (a) 0.66 mg/ml and (b) 2 mg/ml under 395 nm light irradiation.

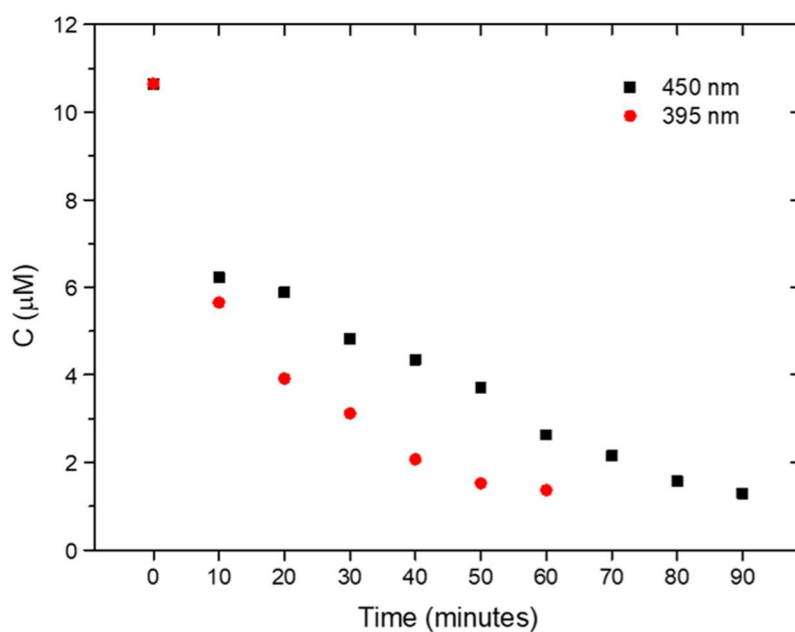

**Figure S8.** The degradation of rhodamine B with Ag/SnO<sub>2</sub>NWs photocatalysts presence under 395 nm (●) and 450 nm (■) irradiation.

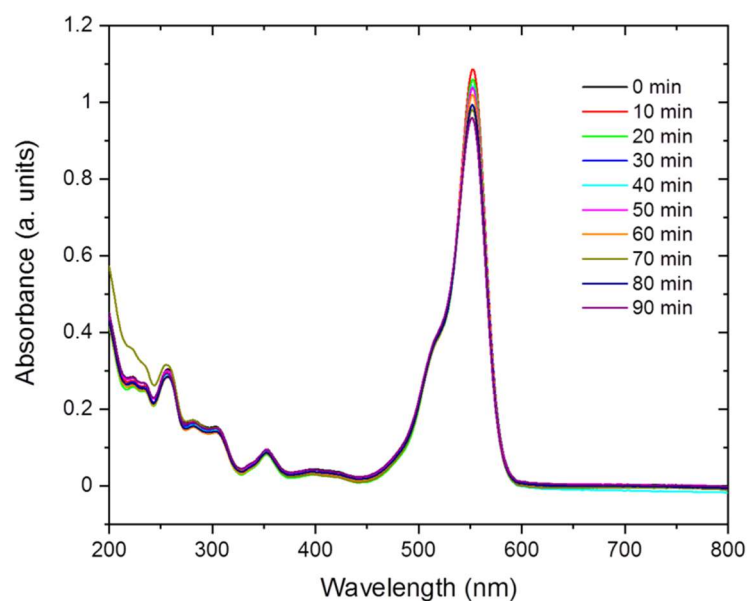

**Figure S9.** Absorbance spectra of rhodamine B irradiated under 450 nm.

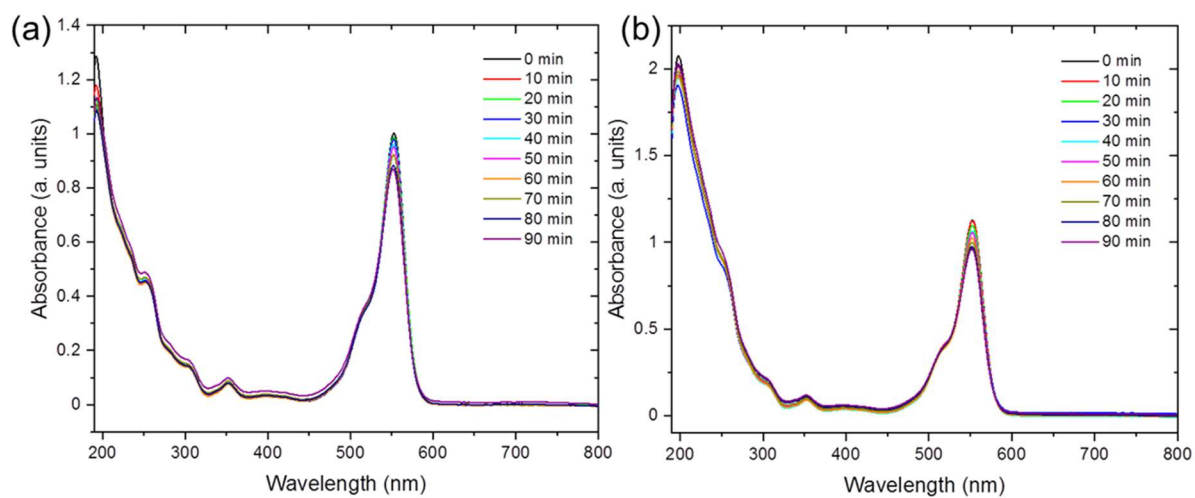

**Figure S10.** Absorbance spectra of rhodamine B with the presence of SnO<sub>2</sub>NPs at a concentration of (a) 0.66 mg/ml and (b) 2 mg/ml under 450 nm light irradiation.

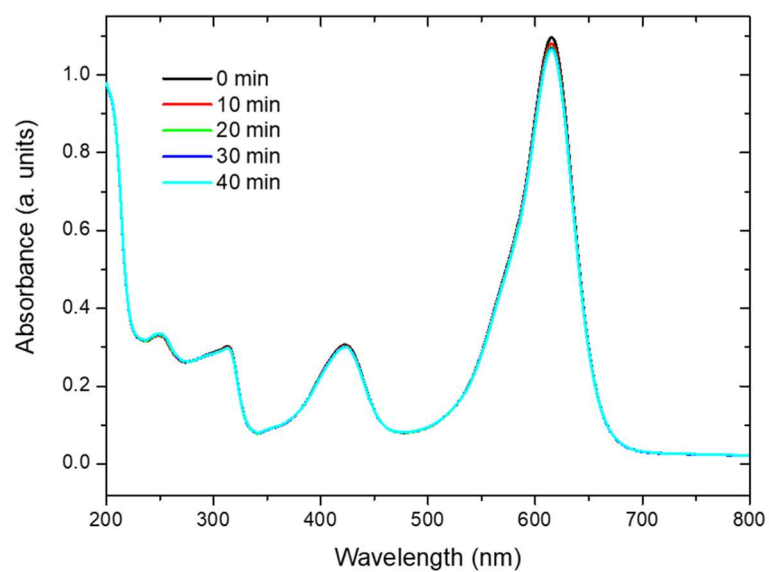

**Figure S11.** Absorbance spectra of malachite green without any irradiation with the presence of Ag/SnO<sub>2</sub>NWs photocatalyst (dark experiment).

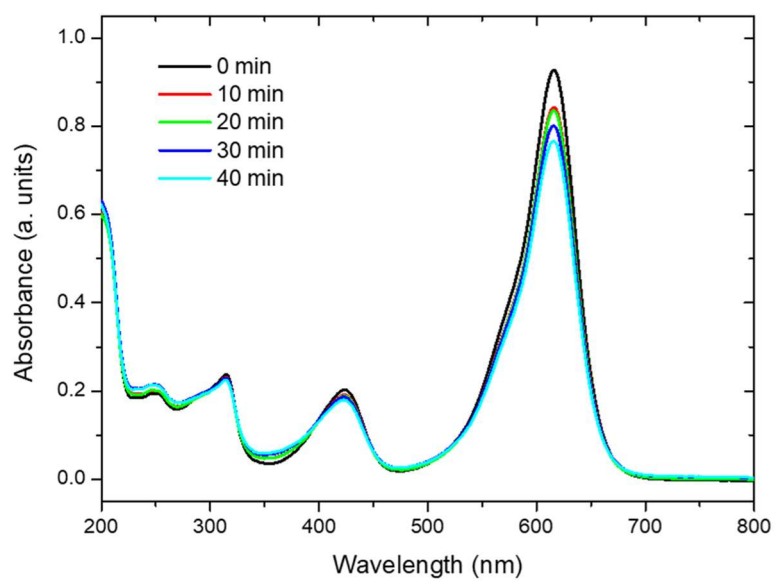

**Figure S12.** Absorbance spectra of malachite green irradiated under 450 nm without catalyst.

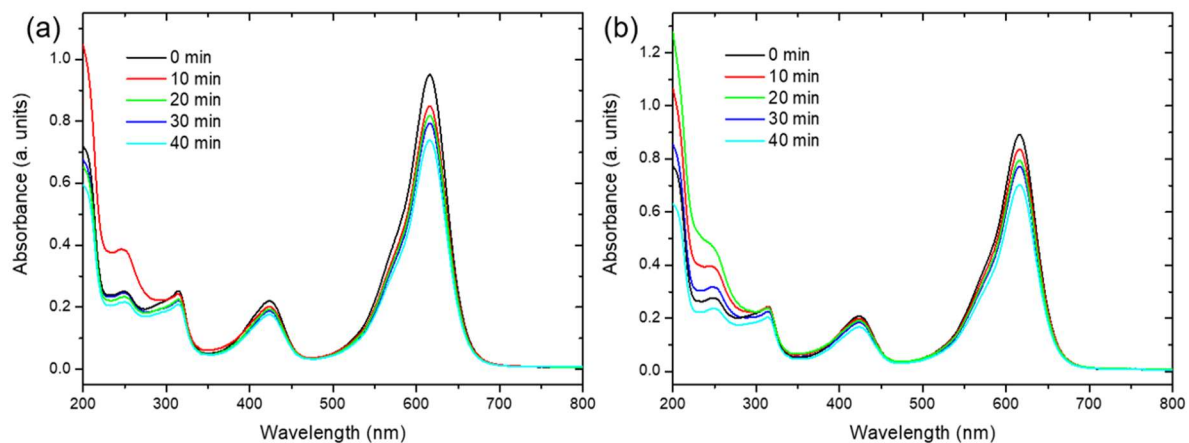

**Figure S13.** Absorbance spectra of malachite green with the presence of SnO<sub>2</sub>NPs at a concentration of (a) 0.66 mg/ml and (b) 2 mg/ml under 450 nm light irradiation.

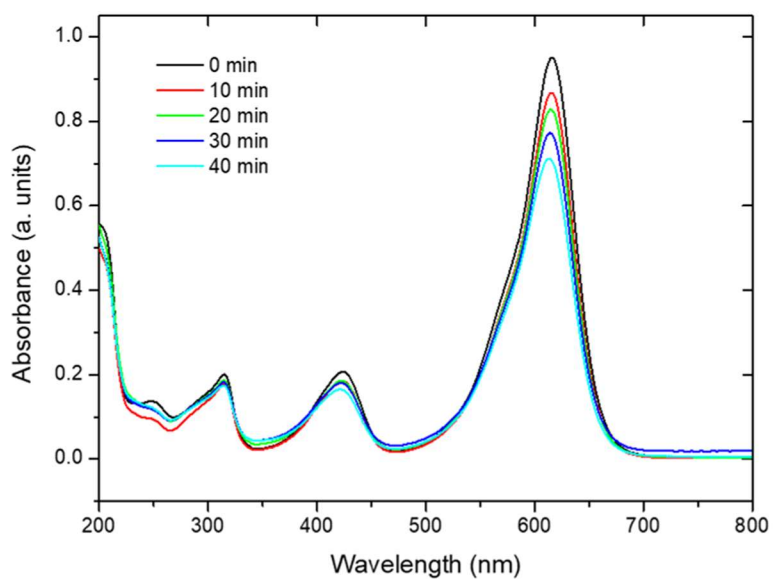

**Figure S14.** Absorbance spectra of malachite green with the presence of 2 mg/ml TiO<sub>2</sub> photocatalyst irradiated under 450 nm with.

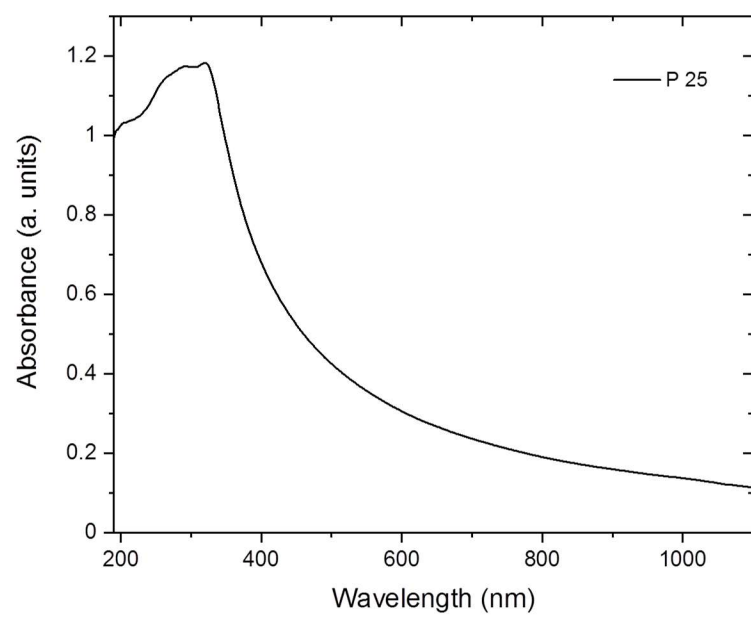

**Figure S15.** Absorbance spectra of TiO<sub>2</sub> (P25).
